# Supplementary material for: Distinct Characteristics of Rye and Wheat Breads Impact on Their in Vitro Gastric Disintegration and in Vivo Glucose and Insulin Responses
Source: MDPI journal article supplement (doi:10.3390/foods5020024), 2016-03-25
Supplement: s1 [file s1]

# Supplementary Materials: Distinct Characteristics of Rye and Wheat Breads Impact on Their *in Vitro* Gastric Disintegration and *in Vivo* Glucose and Insulin Responses

Nordlund Emilia \*, Katina Kati, Mykkänen Hannu and Poutanen Kaisa

**Table S1.** Bread recipes for experimental breads (% of dough weight). Breads: 1 Refined wheat (st) 2, Wholemeal rye (Commercial) (sd), 3 Wholemeal rye (sd), 4 Wholemeal rye + bran (sd), 5 Refined rye (sd), 6 Refined rye (flat) (sd), 7 Refined rye + gluten (flat) (sd), 8 Wholemeal rye/ wheat (st), 9 Wholemeal wheat/ wheat (st), 10 Wheat + fermented bran (st) (sd = sourdough; st = straight dough).

| Raw Materials                                     | Bread No. |     |     |     |     |      |     |       |
|---------------------------------------------------|-----------|-----|-----|-----|-----|------|-----|-------|
|                                                   | 3         | 4   | 5   | 6   | 7   | 8    | 9   | 10    |
| Wholgrain rye flour                               | 43        | 24  |     |     |     | 28   |     |       |
| Wholegrain wheat flour                            |           |     |     |     |     |      | 31  |       |
| Refined rye flour                                 |           |     | 40  | 40  | 39  |      |     |       |
| Refined wheat flour                               |           |     |     |     |     | 20   | 21  | 28    |
| Wheat bran                                        |           |     |     |     |     |      |     | 7     |
| Fresh yeast                                       | 0.8       | 0.9 | 0.9 | 0.9 | 0.9 | 1.56 | 1.7 |       |
| Dried yeast                                       |           |     |     |     |     |      |     | 0.53  |
| Rye bran                                          |           | 17  |     |     |     |      |     |       |
| Water                                             | 21        | 26  | 22  | 22  | 21  | 42   | 38  | 14    |
| Salt                                              | 0.6       | 0.6 | 0.6 | 0.6 | 0.6 | 1.1  | 0.9 | 0.53  |
| Gluten                                            |           |     |     |     | 1.2 | 6    | 6.6 |       |
| Sourdough of wholgrain rye flour (A) <sup>a</sup> | 35        | 32  |     |     |     |      |     |       |
| Sourdough of refined rye flour (B) <sup>b</sup>   |           |     | 37  | 37  | 37  |      |     |       |
| Fermented wheat bran (C) <sup>c</sup>             |           |     |     |     |     |      |     | 32    |
| Sugar                                             |           |     |     |     |     |      |     |       |
| Fat                                               |           |     |     |     |     | 0.71 | 0.7 | 2.1   |
| Enzymes <sup>d</sup>                              |           |     |     |     |     |      |     | 0.025 |

<sup>a</sup> Wholemeal rye sourdough: wholegrain rye flour 37% (of dough weight), salt 0.4%, Lb. brevis 0.37%, Lb. plantarum 0.37%, water 62%, fermentation time 22 h at 30 °C; <sup>b</sup> Refined rye sourdough: refined rye flour 37% (of dough weight), salt 0.4%, Lb. brevis 0.036%, Lb. plantarum 0.036%, water 62%, fermentation time 23 h at 30 °C; <sup>c</sup> Bran fermentation: wheat bran 22% (of dough weight), dried yeast 2.8%, water 78%, fermentation time 16 h at 25 °C; <sup>d</sup> Grindamyl max life (Danisco, Denmark) 0.01% flour weight, + Lipopan 50 BG 0.004% (Novo Nordisk, Denmark), + Pentopan mono BG 0.01% (Novo Nordisk, Denmark).

**Table S2.** Breadmaking process for the experimental breads. Breads: 1 Refined wheat (st) 2, Wholemeal rye (Commercial) (sd), 3 Wholemeal rye (sd), 4 Wholemeal rye + bran (sd), 5 Refined rye (sd), 6 Refined rye (flat) (sd), 7 Refined rye + gluten (flat) (sd), 8 Wholemeal rye/ wheat (st), 9 Wholemeal wheat/ wheat (st), 10 Wheat + fermented bran (st) (sd = sourdough; st = straight dough).

| Bread No.                              | 3       | 4       | 5       | 6     | 7     | 8       | 9     | 10    |
|----------------------------------------|---------|---------|---------|-------|-------|---------|-------|-------|
| Bread Type                             | pan     | pan     | pan     | flat  | flat  | pan     | pan   | pan   |
| Mixing time/min                        | 2 + 2   | 2 + 2   | 2 + 2   | 2 + 2 | 2 + 2 | 3 + 5   | 3 + 5 | 3 + 6 |
| Resting time/min                       | 45      | 45      | 45      | 2     | 2     | 30      | 30    | 20    |
| Resting temperature/ °C and humidity%  | 28/70   | 28/70   | 28/70   | 20    | 20    | 28/70   | 28/75 | 29/76 |
| Proofing time/min                      | 45      | 70      | 50      | 45    | 45    | 55      | 60    | 55    |
| Proofing temperature/ °C and humidity% | 35/70   | 35/70   | 35/70   | 35/50 | 35/50 | 37/80   | 37/75 | 37/80 |
| Loaf size/g                            | 600     | 600     | 400     | 120   | 120   | 500     | 400   | 400   |
| Baking time/min                        | 50      | 50      | 40      | 20    | 20    | 35      | 20    | 20    |
| Baking temperature/ °C                 | 240–220 | 240–220 | 240–220 | 250   | 250   | 240–220 | 230   | 200   |
